# Supplementary material for: Ferromagnetic Dirac half-metallicity in edge-modified zigzag boron nitride nanoribbons
Source: Royal Society of Chemistry journal article supplement (doi:10.1039/d4tc01011f), 2024-01-01
Supplement: d4tc01011f1.pdf [file d4tc01011f1.pdf]

Supporting Information for:

## Ferromagnetic Dirac half-metallicity in edge-modified zigzag boron nitride nanoribbons

Sikandar Khan,<sup>a</sup> Sheng Chen,<sup>a</sup> Weiyi Wang,<sup>\*a</sup> Xiaofeng Liu,<sup>\*b</sup> and Wei Hu,<sup>\*a</sup>

<sup>a</sup> Hefei National Research Center for Physical Sciences at the Microscale, University of Science and Technology of China, Hefei, Anhui 230026, China.

<sup>b</sup> School of Physics, Hefei University of Technology, Hefei, Anhui 230601, China.

\*E-mail: dancingw@ustc.edu.cn (Weiyi Wang); lxf@hfut.edu.cn (Xiaofeng Liu), whuustc@ustc.edu.cn (Wei Hu)

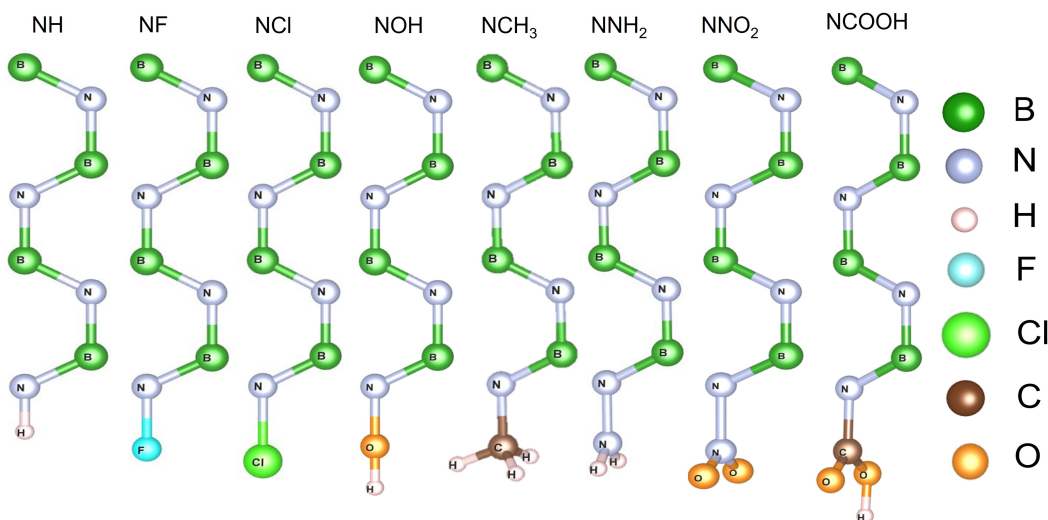

Figure S1: Geometry of ZBNNRs-NX (shown here with  $n = 2$ ) with functional groups (X): H, F, Cl, OH, CH<sub>3</sub>, NH<sub>2</sub>, NO<sub>2</sub>, and COOH. CH<sub>3</sub>, NH<sub>2</sub>, and COOH.

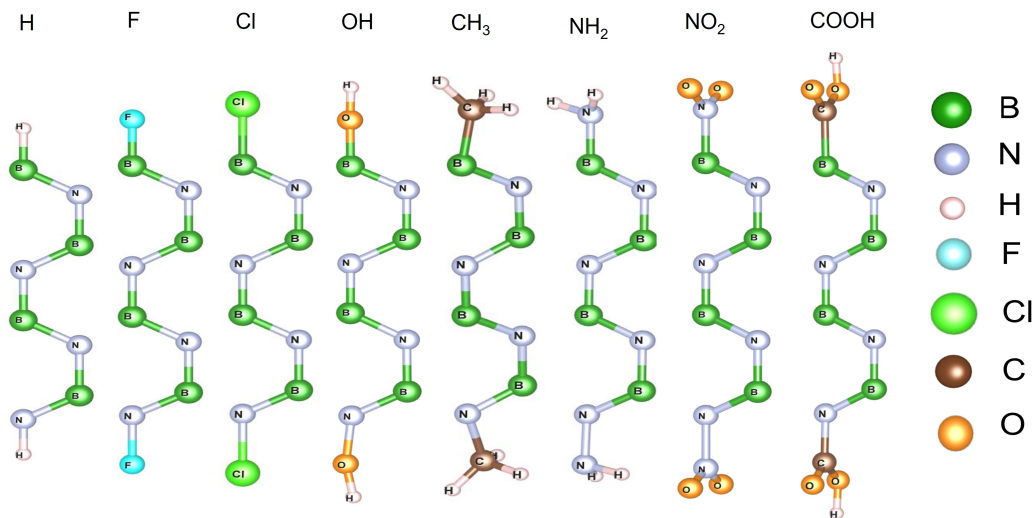

Figure S2: Geometry of ZBNNRs-BX-NX (here with  $n = 2$ ). Both edges are passivated with functional groups (X): H, F, Cl, OH, CH<sub>3</sub>, NH<sub>2</sub>, NO<sub>2</sub>, and COOH. CH<sub>3</sub>, NH<sub>2</sub>, and COOH.

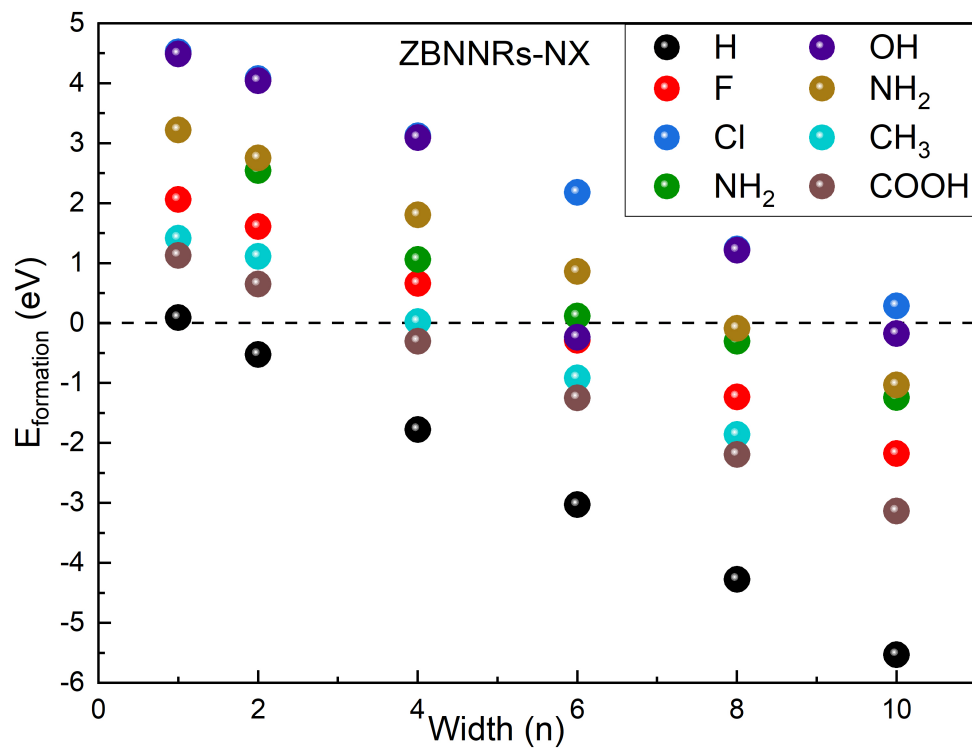

Figure S3: The formation energy  $E_{formation}$  with respect to thickness ( $n$ ) of ZBNNRs-NX.

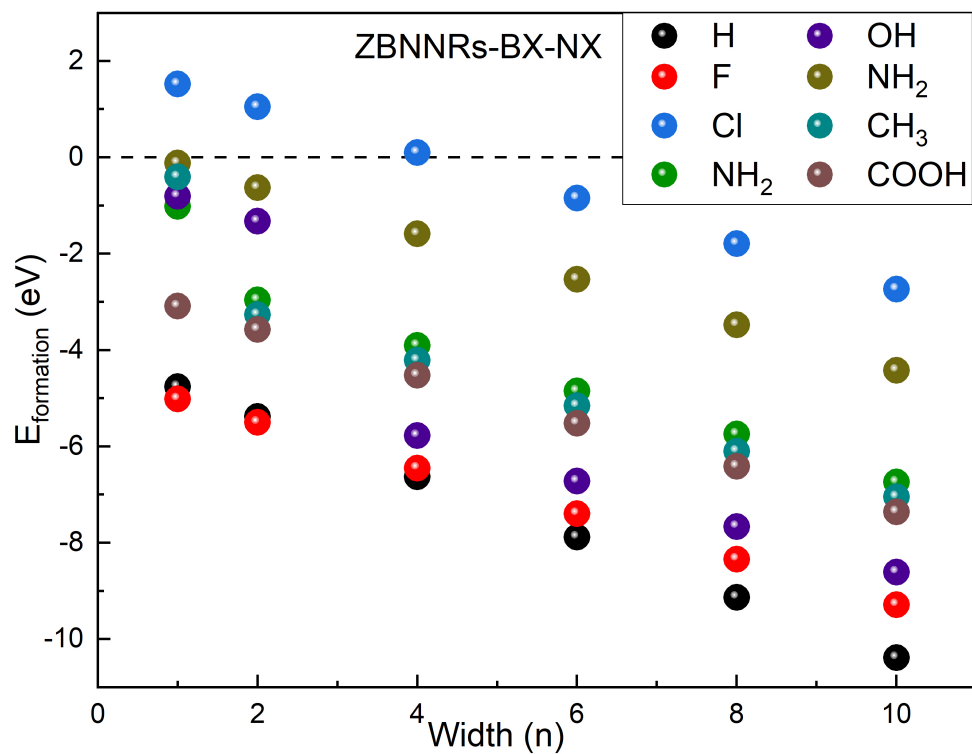

Figure S4: The formation energy  $E_{formation}$  with respect to thickness ( $n$ ) of ZBNNRs-BX-NX.

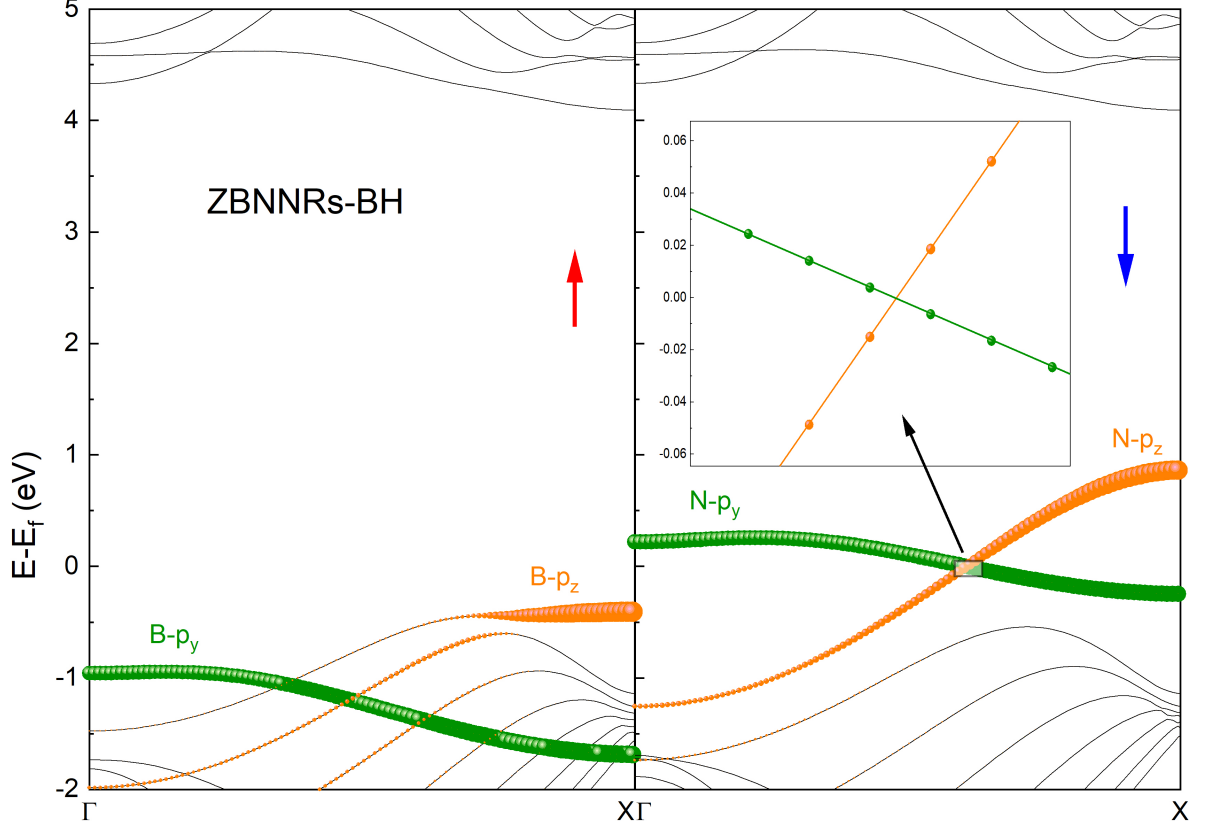

Figure S5: Spin polarized projected band structure for ZBNNRs-BH ( $n = 3$ ). Size of ball shows the contribution of orbitals

Table S1: The spin polarized energy gap, the total energy difference with and without SOC effects  $E_{diff} = E_{DFT+SOC} - E_{DFT}$ , energy difference  $\Delta E$  between FM and AFM configuration, and magnetic exchange coupling parameters  $J_0$  for ZBNNRs-BX with width  $n = 3$ .

| Spin resolved band gap (eV)                    |      |       |       |       |       |                 |       |                 |                 |
|------------------------------------------------|------|-------|-------|-------|-------|-----------------|-------|-----------------|-----------------|
| n                                              | Spin | H     | F     | OH    | COOH  | CH <sub>3</sub> | Cl    | NH <sub>2</sub> | NO <sub>2</sub> |
| 1                                              | up   | 4.385 | 5.137 | 3.679 | 3.073 | metal           | 0.400 | metal           | 1.833           |
|                                                | dn   | 0.099 | 0.114 | 0.017 | 0.050 | metal           | metal | metal           | 0.011           |
| 2                                              | up   | 4.377 | 4.836 | 3.542 | 2.892 | 3.084           | 1.756 | 1.543           | 1.675           |
|                                                | dn   | 0.032 | 0.095 | 0.127 | 0.008 | metal           | metal | metal           | 0.048           |
| 4                                              | up   | 4.505 | 4.759 | 3.545 | 2.863 | 2.766           | 1.393 | 1.118           | 1.964           |
|                                                | dn   | 0.018 | 0.085 | 0.085 | 0.038 | metal           | metal | metal           | 0.024           |
| 6                                              | up   | 4.580 | 4.734 | 3.549 | 3.521 | 2.883           | 1.301 | 0.925           | 1.629           |
|                                                | dn   | 0.020 | 0.086 | 0.076 | 0.062 | 0.031           | metal | metal           | 0.005           |
| 8                                              | up   | 4.562 | 4.657 | 3.571 | 2.887 | 2.752           | 1.164 | metal           | 1.619           |
|                                                | dn   | 0.026 | 0.086 | 0.075 | 0.036 | 0.026           | metal | metal           | 0.066           |
| 10                                             | up   | 4.536 | 4.535 | 3.548 | 3.491 | 2.742           | 1.085 | 0.890           | 1.620           |
|                                                | dn   | 0.131 | 0.058 | 0.071 | 0.059 | 0.031           | metal | 0.030           | 0.016           |
| SOC effect on total energy (meV)               |      |       |       |       |       |                 |       |                 |                 |
| $E_{diff}$                                     |      | -0.6  | -0.8  | -0.7  | -0.81 | -0.7            | -0.2  | -0.8            | -0.9            |
| $\Delta E$ (eV) = $E_{AFM} - E_{FM}$           |      |       |       |       |       |                 |       |                 |                 |
| $\Delta E$                                     |      | 0.138 | 0.166 | 0.115 | 0.117 | 0.115           | 0.173 | 0.129           | 0.248           |
| Nearest magnetic exchange parameter $J_0$ (eV) |      |       |       |       |       |                 |       |                 |                 |
| $J_0$ (eV)                                     |      | 0.138 | 0.166 | 0.115 | 0.117 | 0.115           | 0.173 | 0.129           | 0.248           |

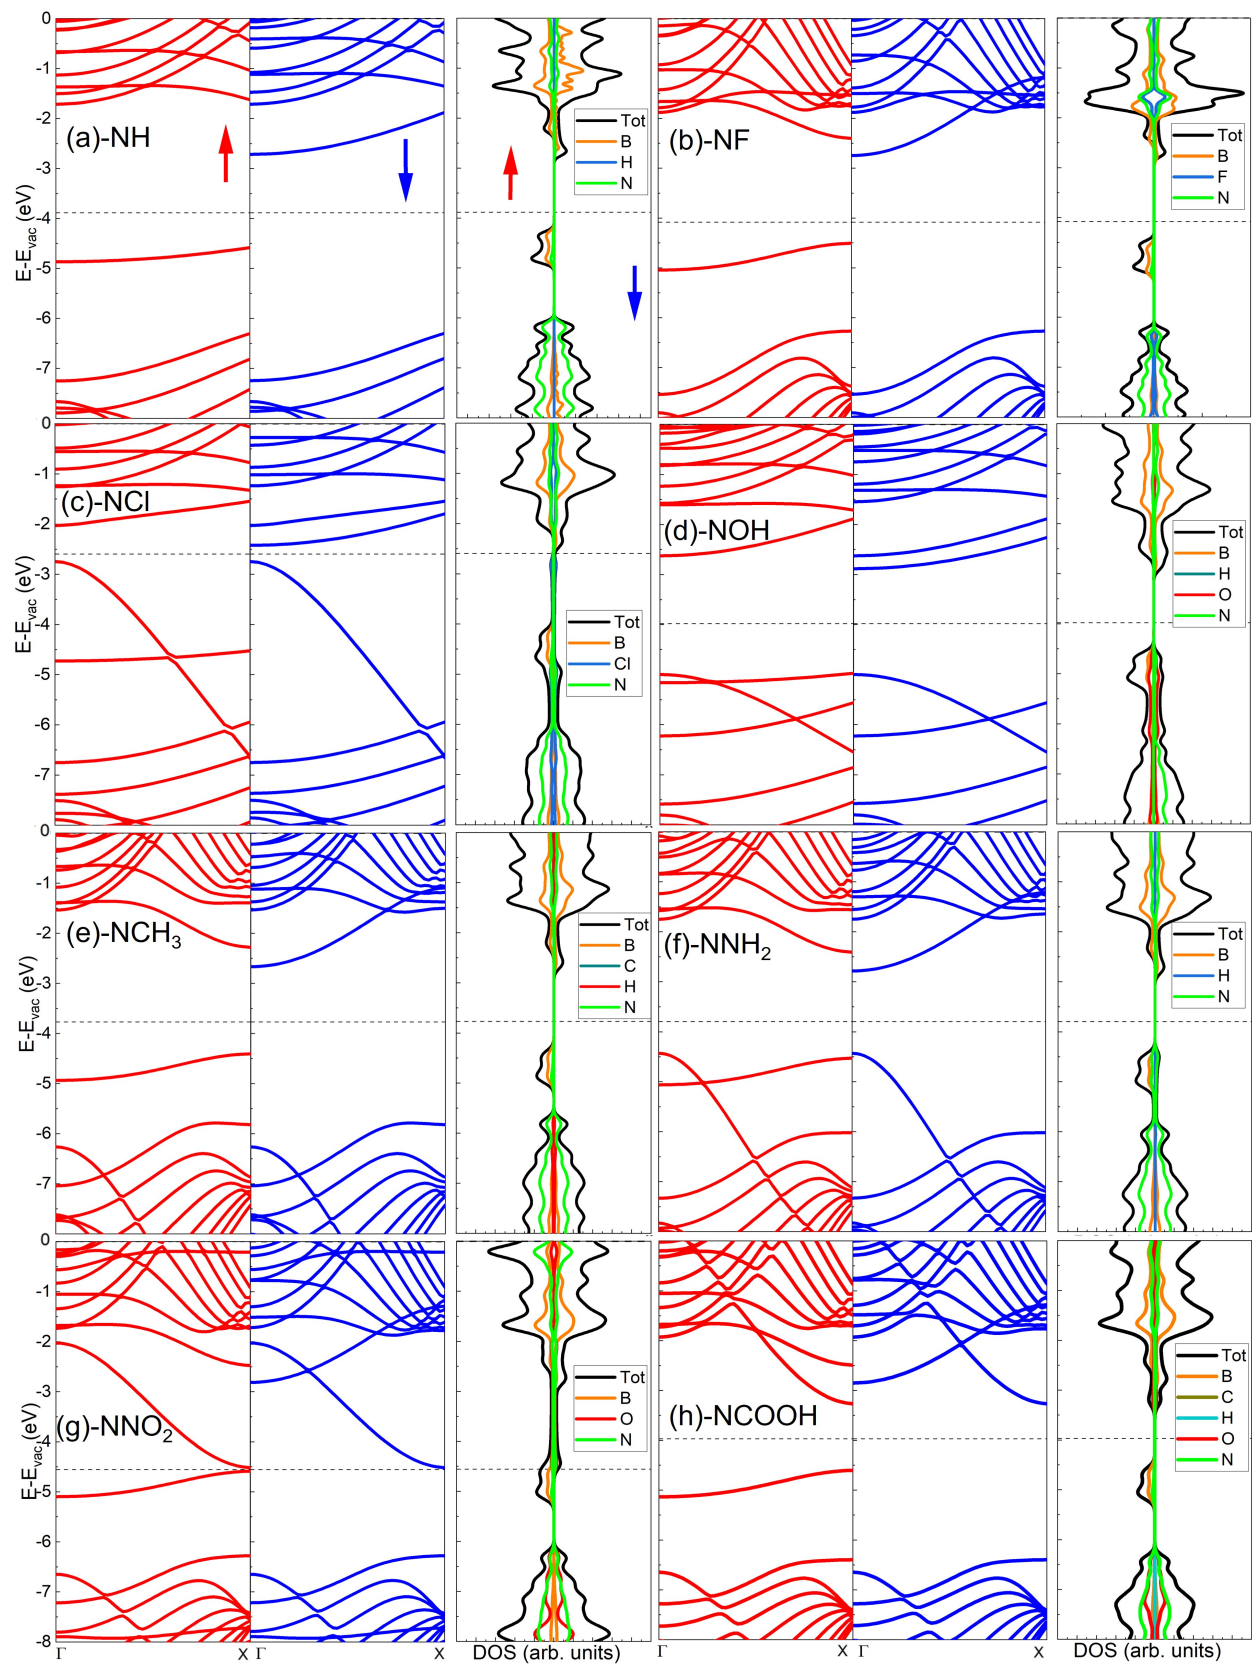

Figure S6: Majority spin (red), minority spin (blue), density of states for ZBNNRs-NX where X = (a) H, (b) F, (c) Cl, (d) OH, (e) CH<sub>3</sub>, (f) NH<sub>2</sub>, (g) NO<sub>2</sub> (h) COOH. All NRs have energy gap in semiconducting range for spins except X = NO<sub>2</sub>, which behaves as half metal.

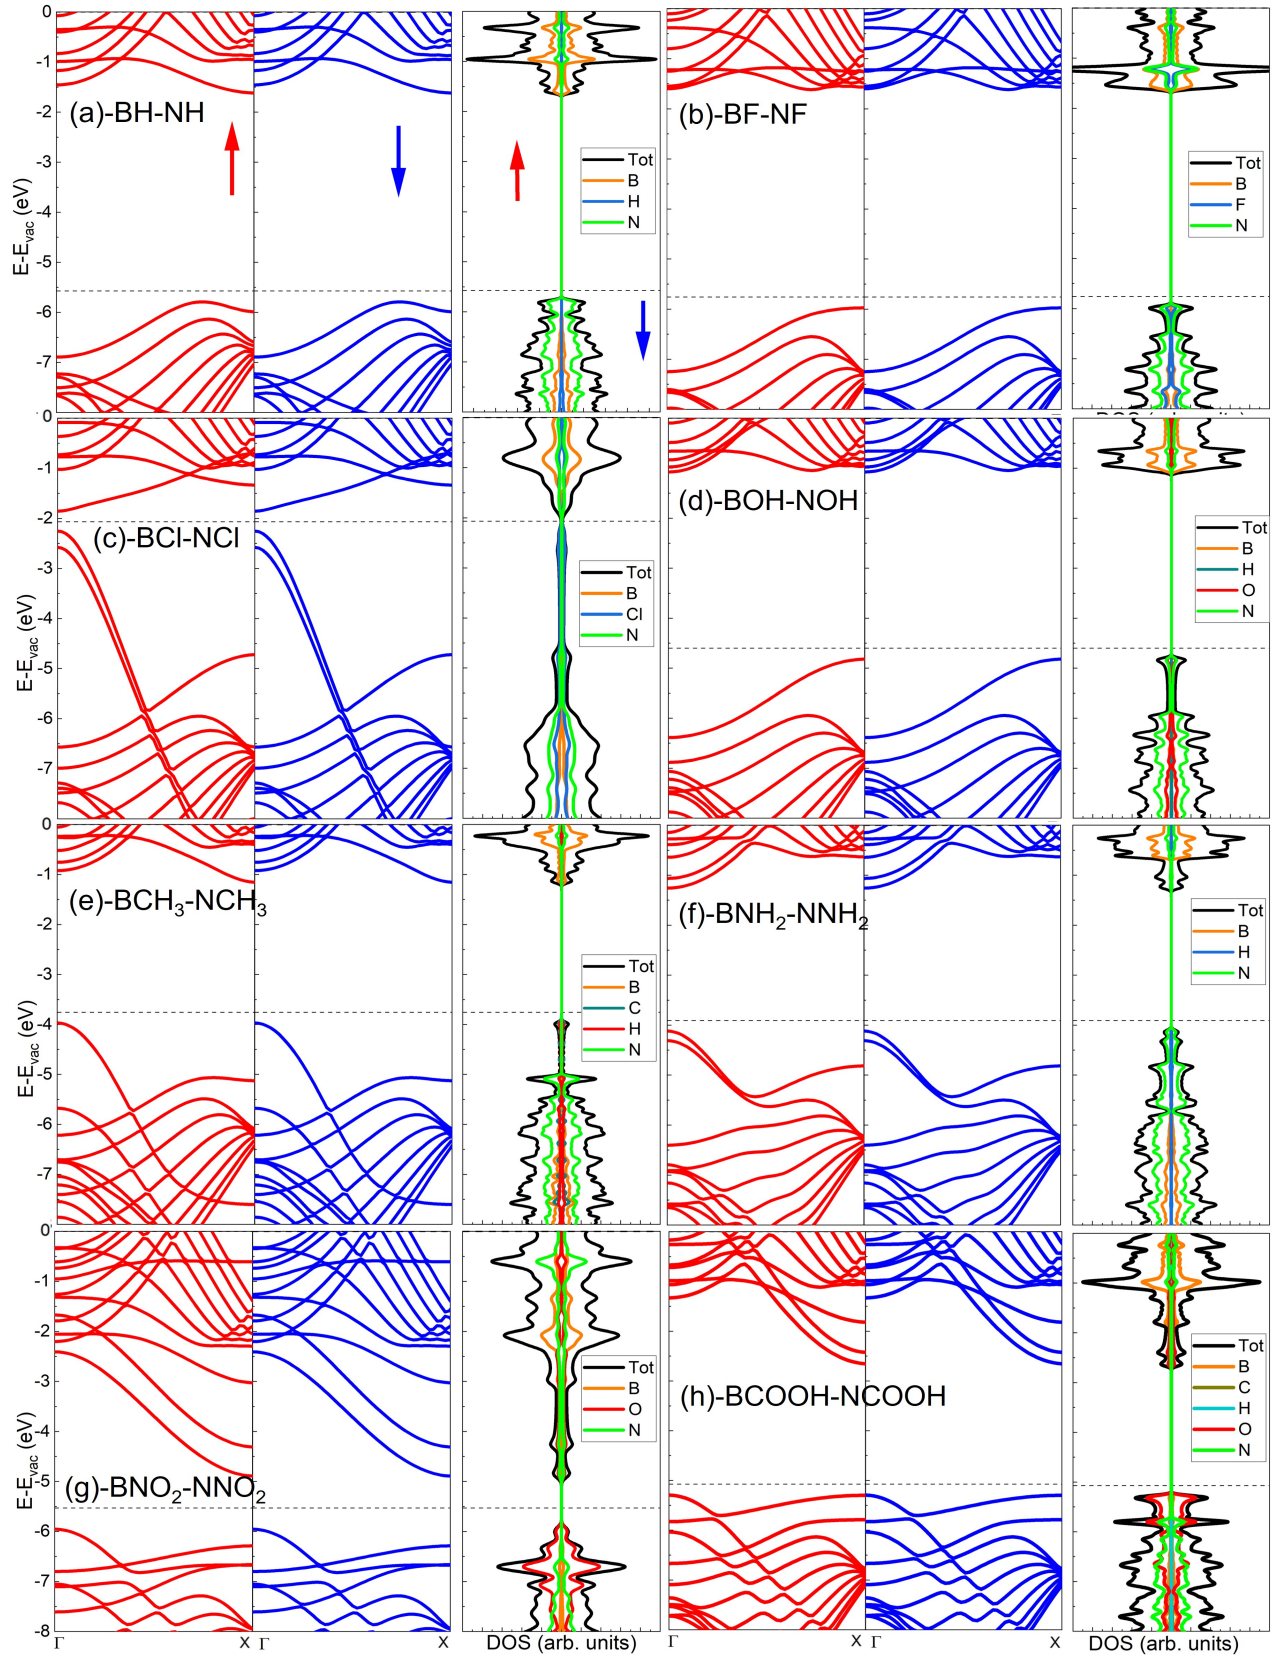

Figure S7: Band structure for Majority spin (red), minority spin (blue), and density of states for ZBNRs-BX-NX, where X = (a) H, (b) F, (c) Cl, (d) OH, (e) CH<sub>3</sub>, (f) NH<sub>2</sub>, (g) NO<sub>2</sub>, and (h) COOH.

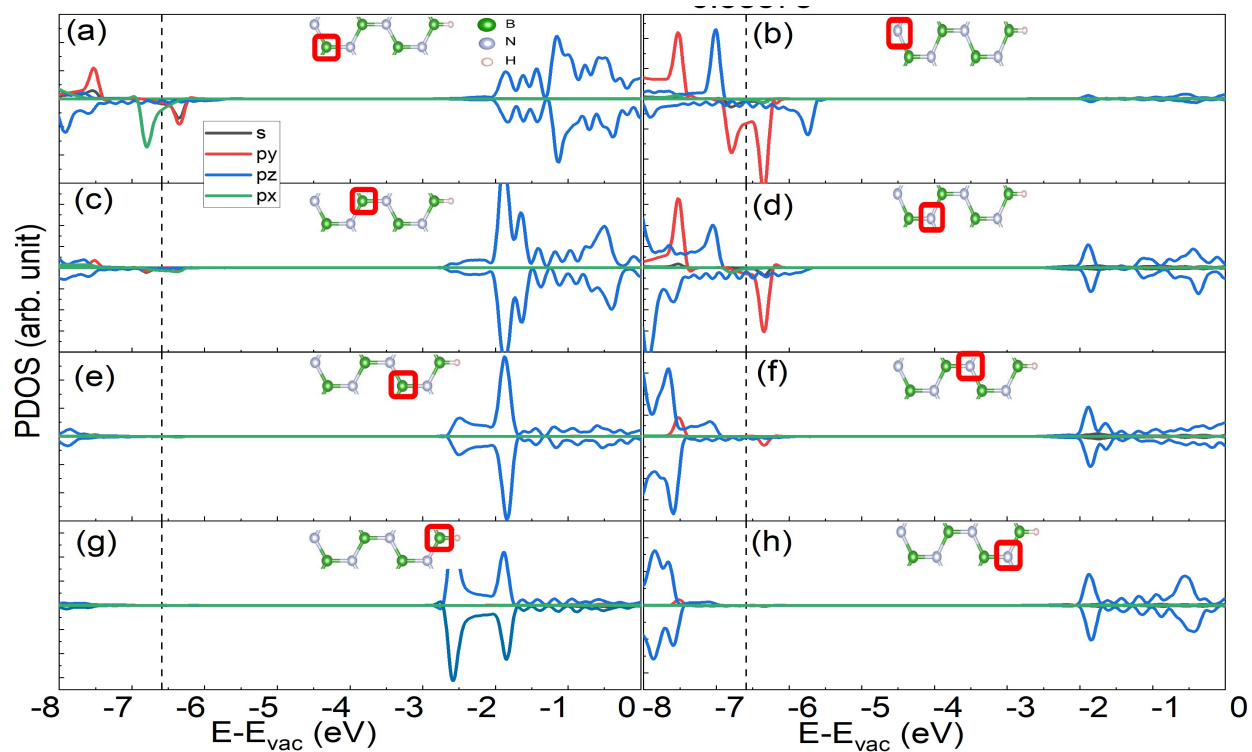

Figure S8: Projected density of states of each boron atom in (a, c, e, g) and nitrogen atom (specified by red boxes) in (b, d, f, h) for ZBNNRs-BH with  $n = 2$ .

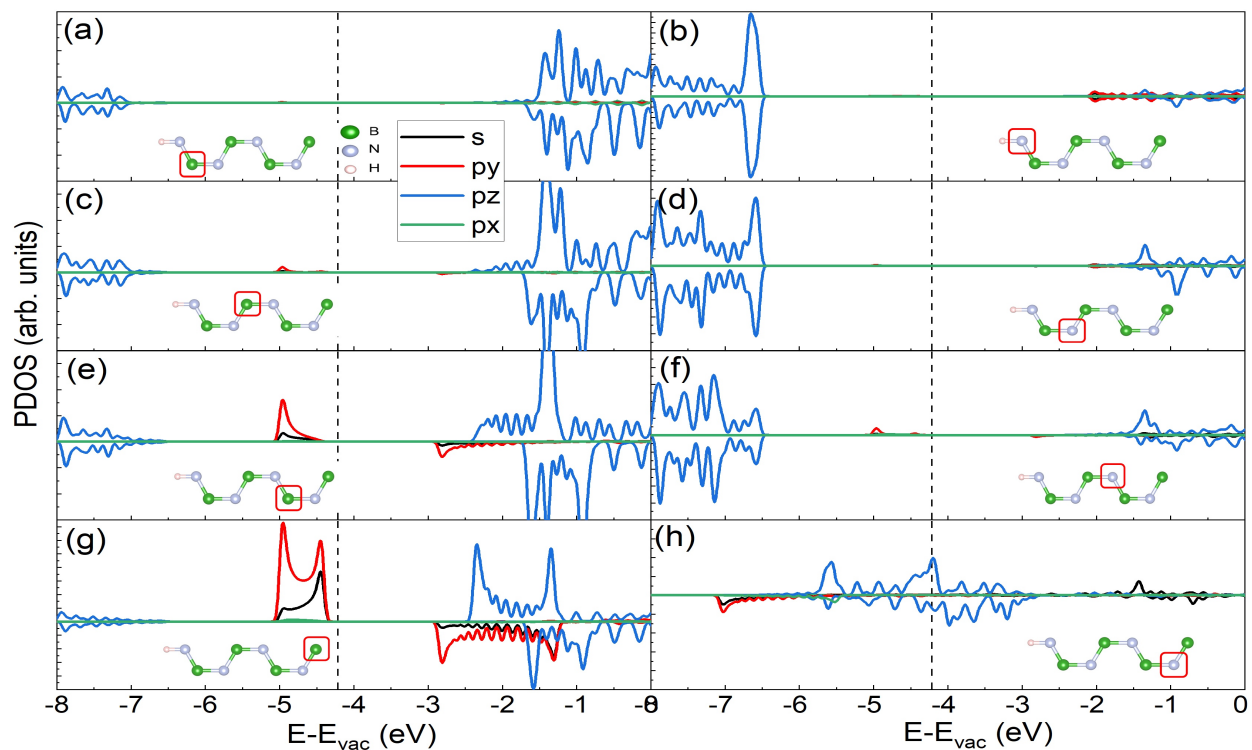

Figure S9: Projected density of states of each boron atom in (a, c, e, g) and nitrogen atom (specified by red boxes) in (b, d, f, h) for ZBNNRs-NH with  $n = 2$ .

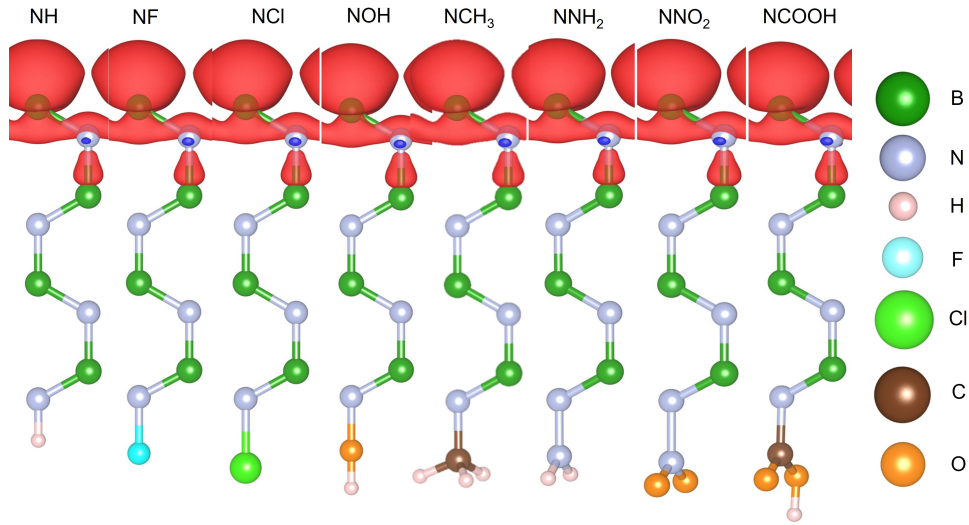

Figure S10: Electron spin density of ZBNNRs-NX (with  $n = 2$ ) with  $X = \text{H}, \text{F}, \text{Cl}, \text{OH}, \text{CH}_3, \text{NH}_2, \text{NO}_2,$  and  $\text{COOH}$ . Red and blue color show spin-up and spin-down density with an isosurface value of  $0.005 \text{ Bohr}^{-3}$ .

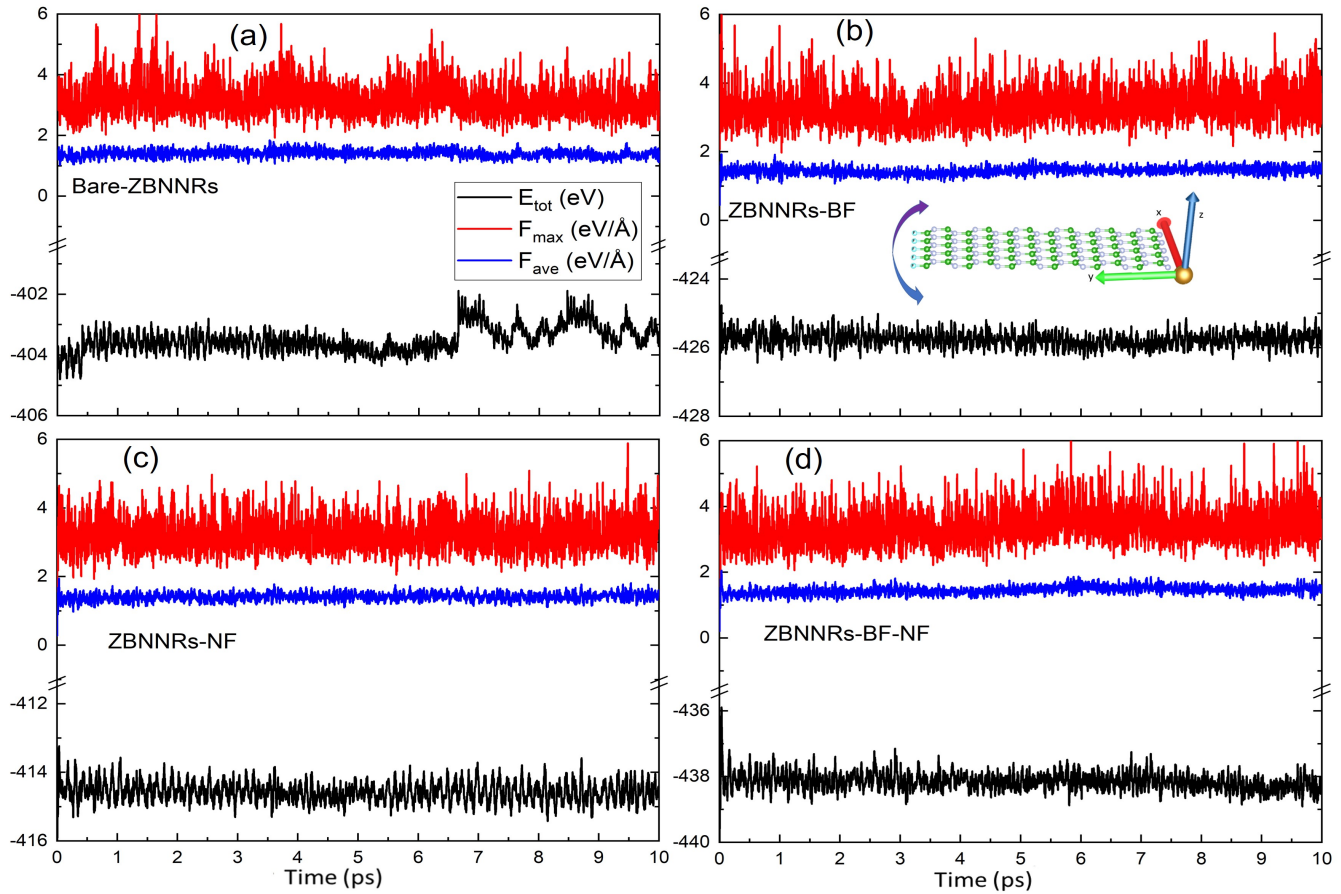

Figure S11: Evolution of total energy, maximum and average forces with respect to time for (a) bare, (b-d) ZBNNRs-BF, (c) ZBNNRs-NF, and (d) ZBNNRs-BF-NF.

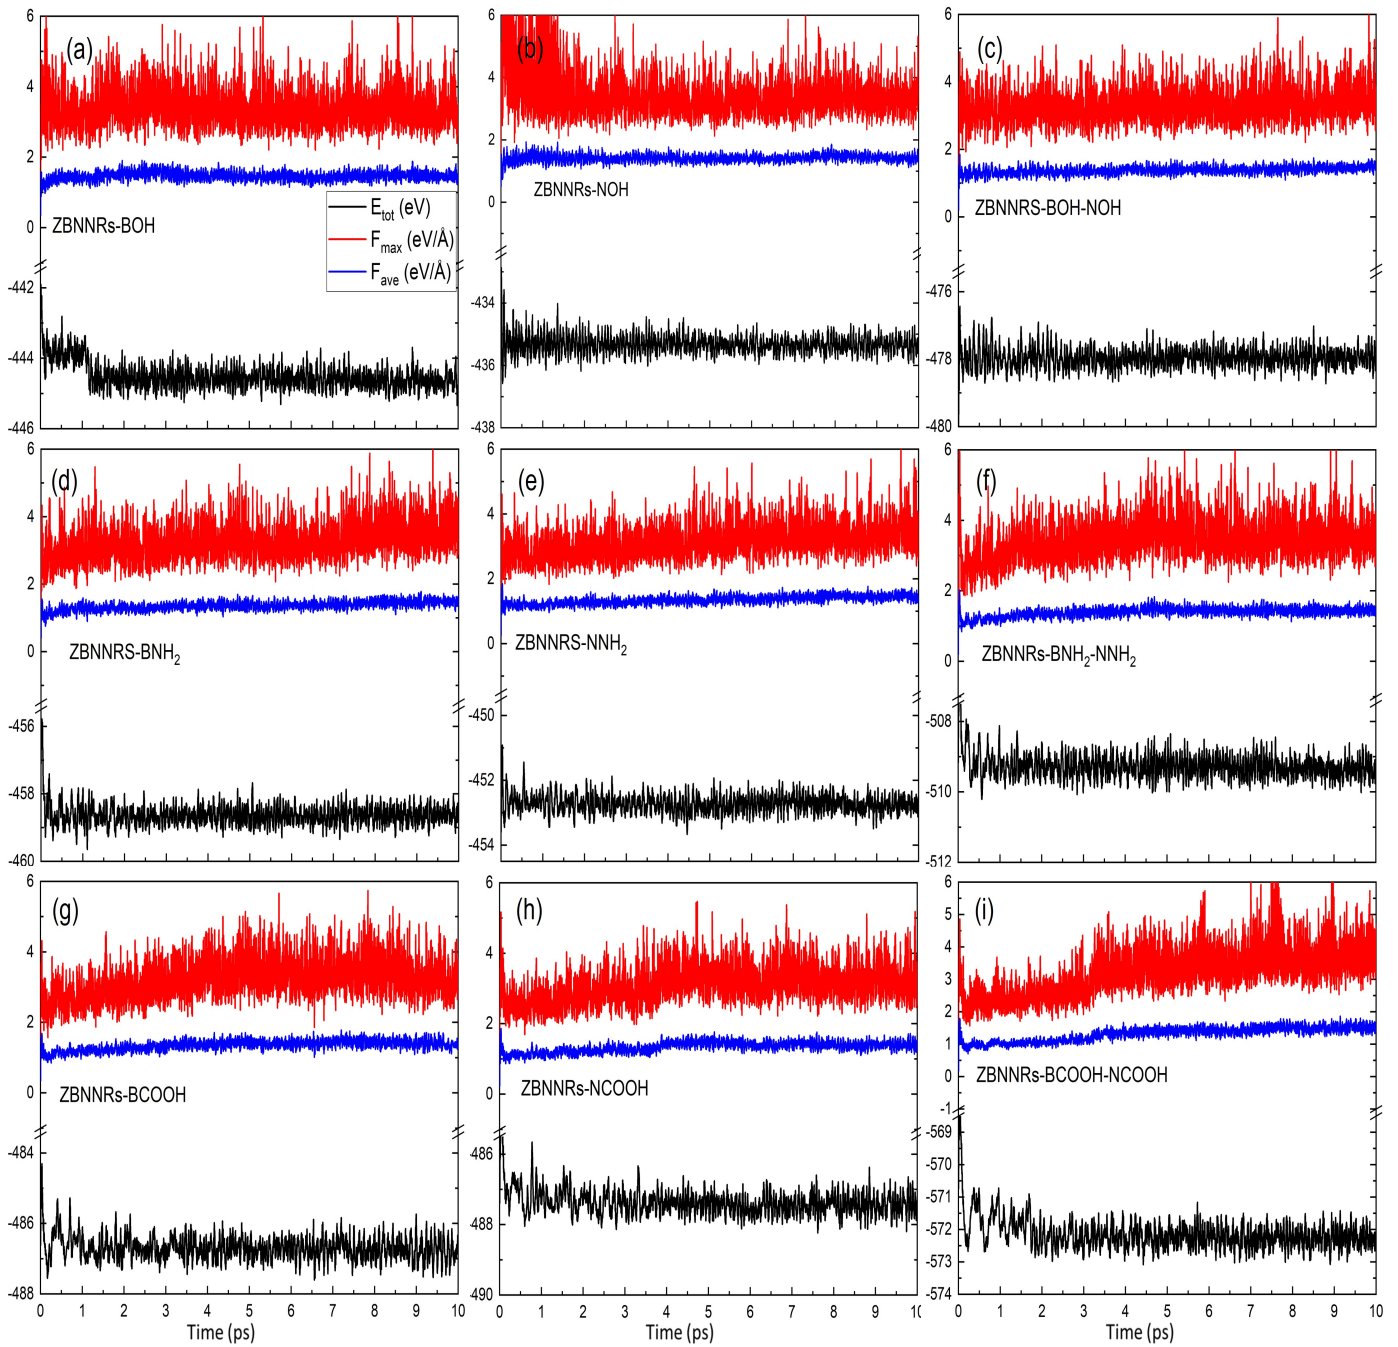

Figure S12: Evolution of total energy, maximum and average forces with respect to time for ZBNNRs with (a-c) OH, (d-f) NH<sub>2</sub>, and (g-i) COOH.



Table S2: Spin polarized energy gap (eV) of ZBNNRs-NX with respect to width (n).

| n  | Spin | H     | F     | OH    | COOH  | CH <sub>3</sub> | Cl    | NH <sub>2</sub> | NO <sub>2</sub> |
|----|------|-------|-------|-------|-------|-----------------|-------|-----------------|-----------------|
| 1  | up   | 2.097 | 2.241 | 1.743 | 1.296 | 2.123           | 0.689 | 1.423           | 0.116           |
|    | dn   | 3.84  | 3.074 | 1.717 | 3.166 | 3.666           | 0.074 | 2.660           | 1.853           |
| 2  | up   | 2.058 | 2.112 | 1.685 | 1.254 | 2.1394          | 0.721 | 0.577           | 0.064           |
|    | dn   | 3.723 | 3.511 | 2.009 | 3.139 | 2.704           | 0.406 | 0.067           | 1.780           |
| 4  | up   | 2.053 | 2.111 | 2.006 | 1.343 | 2.1329          | 0.713 | 2.029           | 0.075           |
|    | dn   | 3.401 | 3.525 | 1.760 | 3.136 | 3.122           | 0.323 | 1.649           | 1.764           |
| 6  | up   | 2.053 | 2.111 | 2.123 | 1.358 | 2.1311          | 0.623 | 1.871           | 0.083           |
|    | dn   | 3.172 | 3.528 | 2.460 | 3.134 | 2.868           | 0.236 | 1.491           | 1.761           |
| 8  | up   | 2.047 | 2.113 | 1.711 | 1.534 | 2.1265          | 0.595 | 0.511           | 0.077           |
|    | dn   | 3.19  | 3.536 | 1.308 | 3.136 | 2.734           | 0.208 | 0.052           | 1.757           |
| 10 | up   | 2.051 | 2.113 | 2.222 | 1.593 | 1.0173          | 0.587 | 0.477           | 0.083           |
|    | dn   | 2.889 | 3.537 | 1.682 | 3.136 | 1.017           | 0.211 | 0.055           | 1.756           |

Table S3: Spin polarized energy gap (eV) of ZBNNRs-BX-NX with respect to width (n).

| n  | Spin | H     | F     | OH    | COOH  | CH <sub>3</sub> | Cl    | NH <sub>2</sub> | NO <sub>2</sub> |
|----|------|-------|-------|-------|-------|-----------------|-------|-----------------|-----------------|
| 1  | up   | 4.548 | 4.349 | 1.746 | 2.466 | 2.770           | 0.319 | 0.025           | 0.782           |
|    | dn   | 4.548 | 4.349 | 1.746 | 2.466 | 2.768           | 0.319 | 0.186           | 0.782           |
| 2  | up   | 4.423 | 4.393 | 1.695 | 2.579 | 2.817           | 0.335 | 2.863           | 0.894           |
|    | dn   | 4.423 | 4.393 | 1.695 | 2.579 | 2.817           | 0.335 | 2.864           | 0.894           |
| 4  | up   | 4.176 | 4.366 | 3.747 | 2.645 | 2.819           | 0.398 | 2.859           | 1.066           |
|    | dn   | 4.176 | 4.366 | 3.746 | 2.645 | 2.819           | 0.398 | 2.859           | 1.066           |
| 6  | up   | 3.992 | 4.326 | 3.711 | 0.794 | 2.806           | 0.468 | 2.861           | 1.150           |
|    | dn   | 3.992 | 4.326 | 3.710 | 0.016 | 2.806           | 0.468 | 2.861           | 1.150           |
| 8  | up   | 4.010 | 4.295 | 3.700 | 2.818 | 2.814           | 0.501 | 2.816           | 1.316           |
|    | dn   | 4.010 | 4.298 | 3.708 | 2.818 | 2.814           | 0.500 | 2.808           | 1.316           |
| 10 | up   | 3.771 | 4.282 | 3.696 | 2.843 | 2.808           | 0.502 | 2.891           | 1.350           |
|    | dn   | 3.771 | 4.288 | 3.701 | 2.843 | 2.808           | 0.501 | 2.888           | 1.350           |
